# Supplementary figures and images for: Metabolic flux balance analysis and the in silico analysis of Escherichia coli K-12 gene deletions
Source: Springer Nature journal article supplement (doi:10.1186/1471-2105-1-1), 2000-07-27

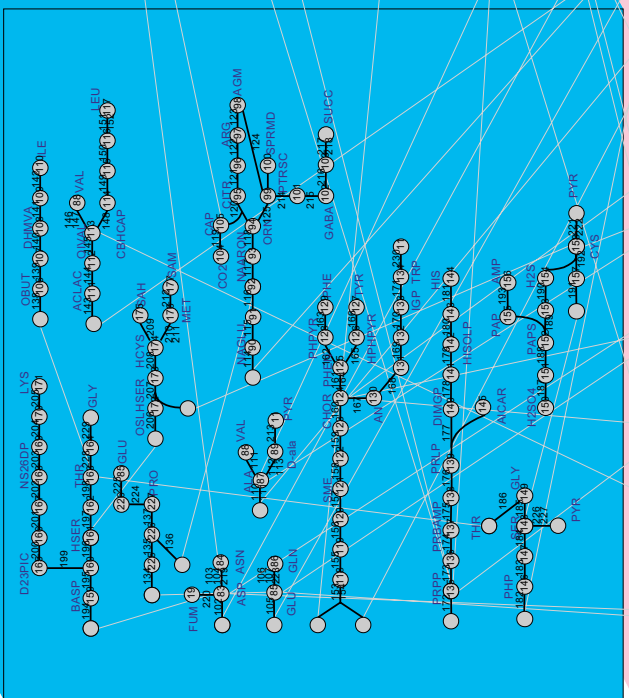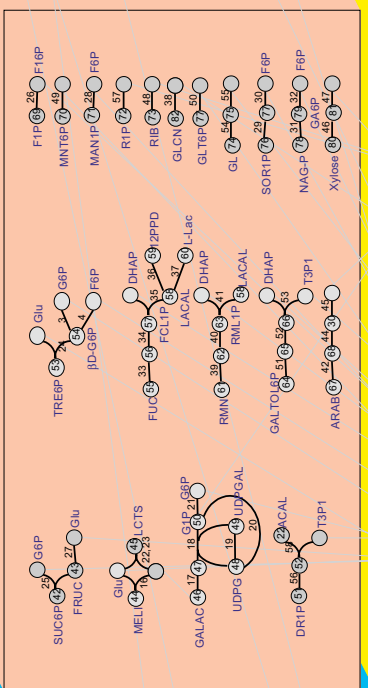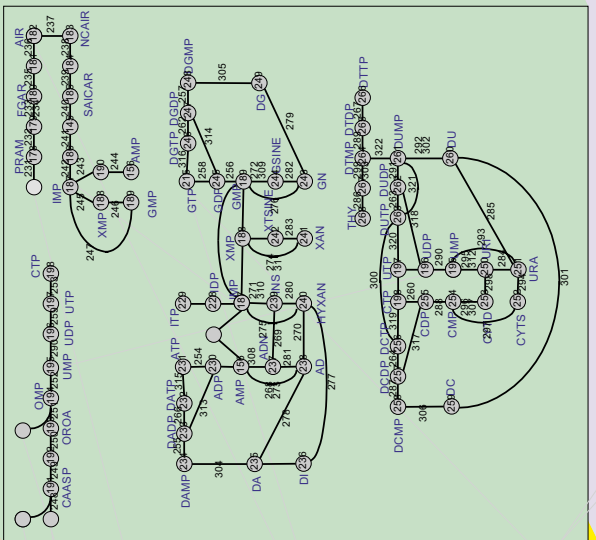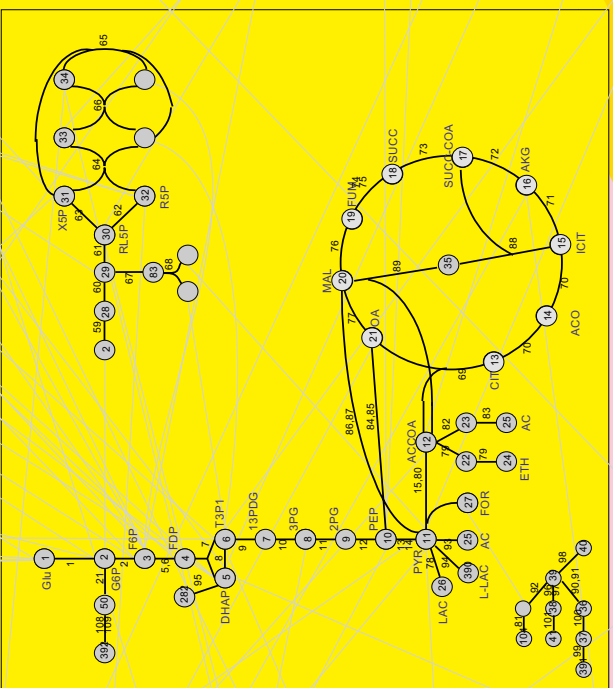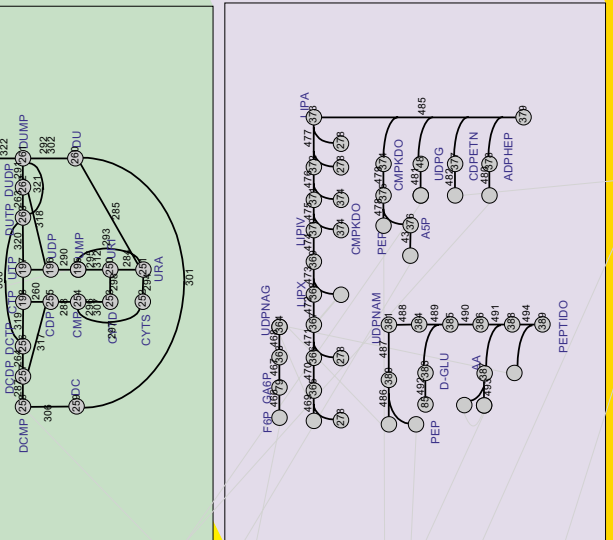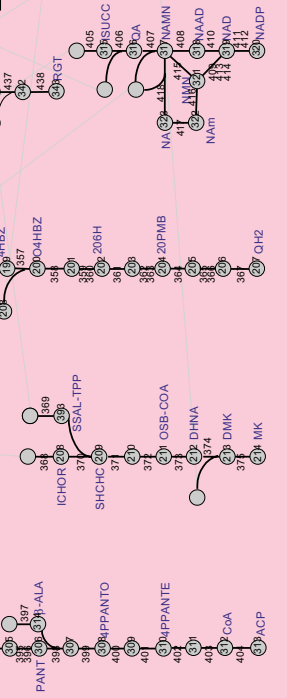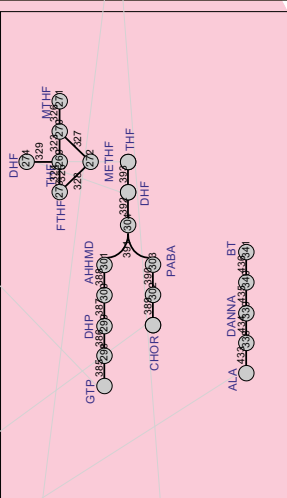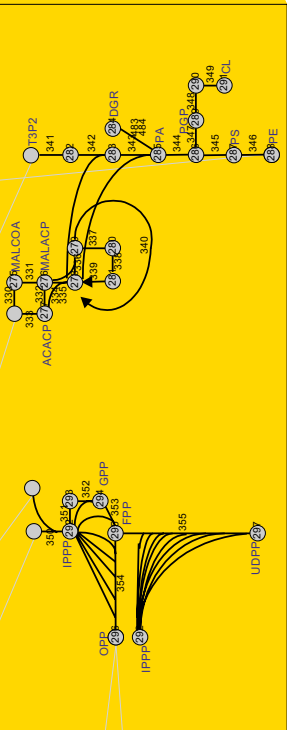

Supplement: 12859_2000_1_MOESM1_ESM.pdf [file 12859_2000_1_MOESM1_ESM.pdf]
